# Supplementary material for: MWCNT Decorated Rich N-Doped Porous Carbon with Tunable Porosity for CO2 Capture
Source: MDPI journal article supplement (doi:10.3390/molecules26113451), 2021-06-07
Supplement: s1 [file s1]

## Supporting Information

**CO<sub>2</sub> adsorption experiment.** CO<sub>2</sub> adsorption capacity was measured by a self-made static adsorption apparatus as illustrated in the scheme below. The apparatus mainly includes gas cylinders (CO<sub>2</sub>, N<sub>2</sub>, and He), constant temperature adsorption cell, vacuum pump, and pressure sensing device. The vacuum pump provided a vacuum environment for the whole apparatus, and the adsorption device was placed in a water bath to ensure the constant temperature adsorption. The pressure of the experimental system was measured by a pressure sensing device.

In this apparatus, a certain mass of adsorbents was loaded into the adsorption cell, then the whole apparatus was vacuumed. Next, CO<sub>2</sub> with a certain pressure was pumped into the pressure cell. Finally opening the adsorption cell valve so that the gas pressure in the two cells can achieve equilibrium. Through the available volume of the two cells and the inside pressure data, the molar volume of gas can be calculated by thermodynamic equation to obtain the adsorption capacity of the material.

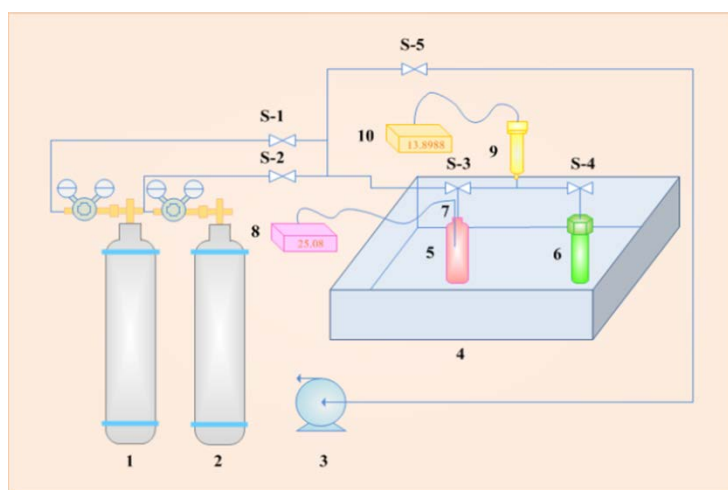

**Scheme S1.** Diagram of the experimental apparatus: (1) He steel cylinder, (2) CO<sub>2</sub> steel cylinder, (3) Vacuum pump, (4) Thermostat water bath, (5) Reactor vessel, (6) Adsorption vessel, (7) Temperature controller, (8) Temperature monitors, (9) Pressure transducer, (10) Pressure monitors.

The Redlich Kwong (RK) equation was used to calculate the molar volume of gas (Eq. S1). The environmental parameters, the degree of vacuum pumping and other factors led to the difference in the effective volume of the adsorption cell. Helium gas was pumped into the apparatus which was not adsorbed by adsorbents. Eq. S2 was used to correct the effective volume of the adsorption cell. Eq. S3 was used to calculate the CO<sub>2</sub> adsorption capacity at the target pressure. Eq. S4 was used to calculate the accumulated CO<sub>2</sub> adsorption capacity at multiple target pressures, which was applied to test adsorption isotherm curves.

$$P = \frac{RT}{V-b} - \frac{a}{T^{1/2}V(V+b)} \quad (S1)$$

$$V_{fs} = \frac{V_p(v_{He-pfs} - v_{He-p})}{v_{He-p}} \quad (S2)$$

$$n_i = \frac{V_p}{v_{p,i}m} - \frac{V_p + V_{fs}}{v_{pfs,i}m} \quad i=1 \quad (S3)$$

$$n_i = n_{i-1} + \frac{V_p}{v_{p,i}m} + \frac{V_{fs}}{v_{pfs,i-1}m} - \frac{V_p + V_{fs}}{v_{pfs,i}m} \quad i=2,3,4,\dots \quad (S4)$$

where  $V_p$  (mL) is pressure cell volume;  $V_{fs}$  (mL) is effective volume of adsorption cell;  $v_{He-p}$  (mL/mmol) is molar volume of helium filled with pressure cell;  $v_{He-pfs}$  (mL/mmol) is molar volume of helium gas when adsorption equilibrium is reached;  $v_{p,i}$  (mL/mmol) is molar volume of CO<sub>2</sub> in pressure cell;  $v_{pfs,i}$  (mL/mmol) is molar volume of CO<sub>2</sub> when adsorption equilibrium is reached;  $n_i$  (mmol/g) is CO<sub>2</sub> adsorption capacity at target pressures;  $m$  (g) is mass of adsorbent; and  $i$  is number of times to achieve equilibrium.

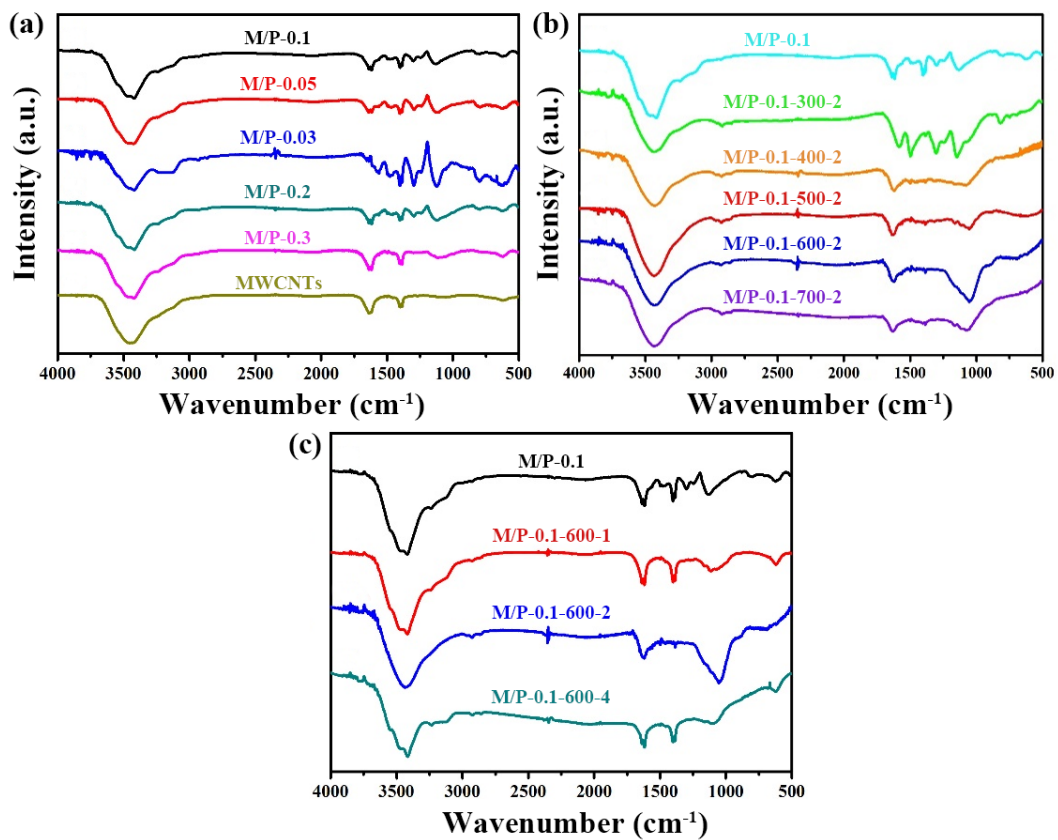

**Figure S1.** FTIR spectra of (a) M/P-x (x = 0, 0.03, 0.05, 0.1, 0.2, and 0.3), (b) M/P-0.1-T-2 (T = 0, 300, 400, 500, 600, and 700), and (c) M/P-0.1-600-y (y = 0, 1, 2, and 4).

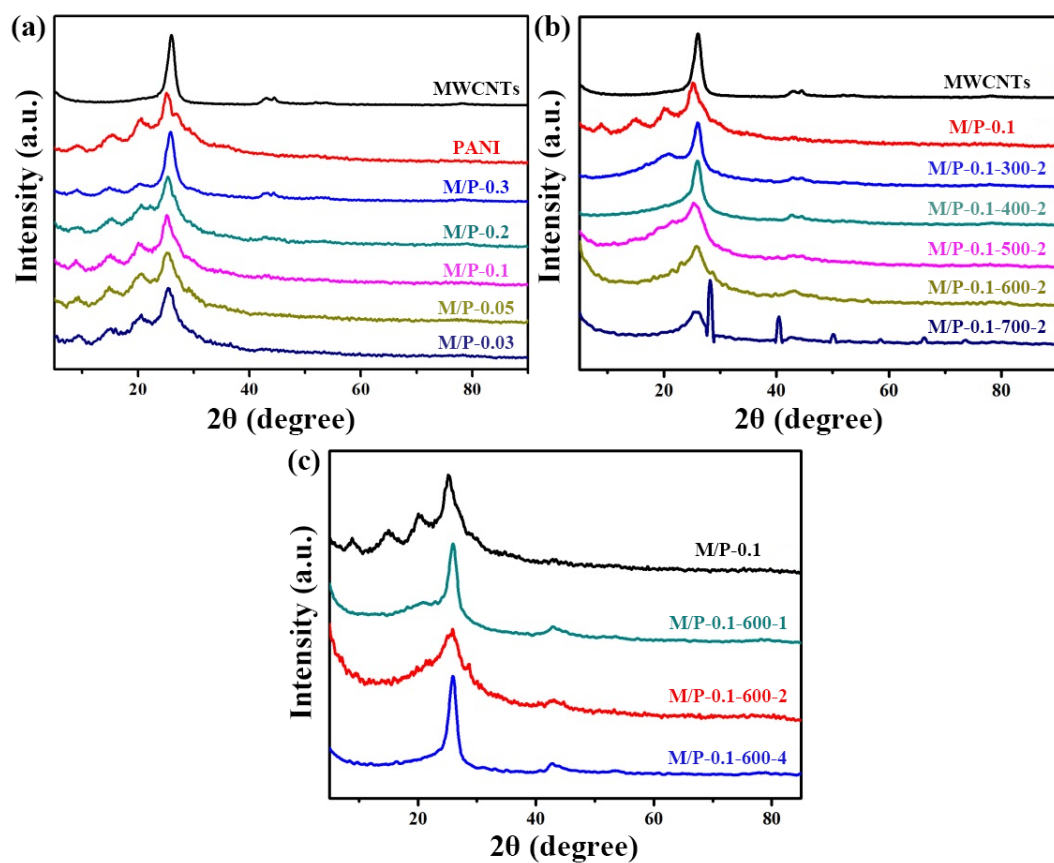

**Figure S2.** The XRD patterns of the precursor (a) M/P-x ( $x = 0, 0.03, 0.05, 0.1, 0.2$ , and  $0.3$ ), (b) M/P-0.1-T ( $T = 0, 300, 400, 500, 600$ , and  $700$ ), and (c) M/P-0.1-600-y ( $y = 0, 1, 2$ , and  $4$ ).

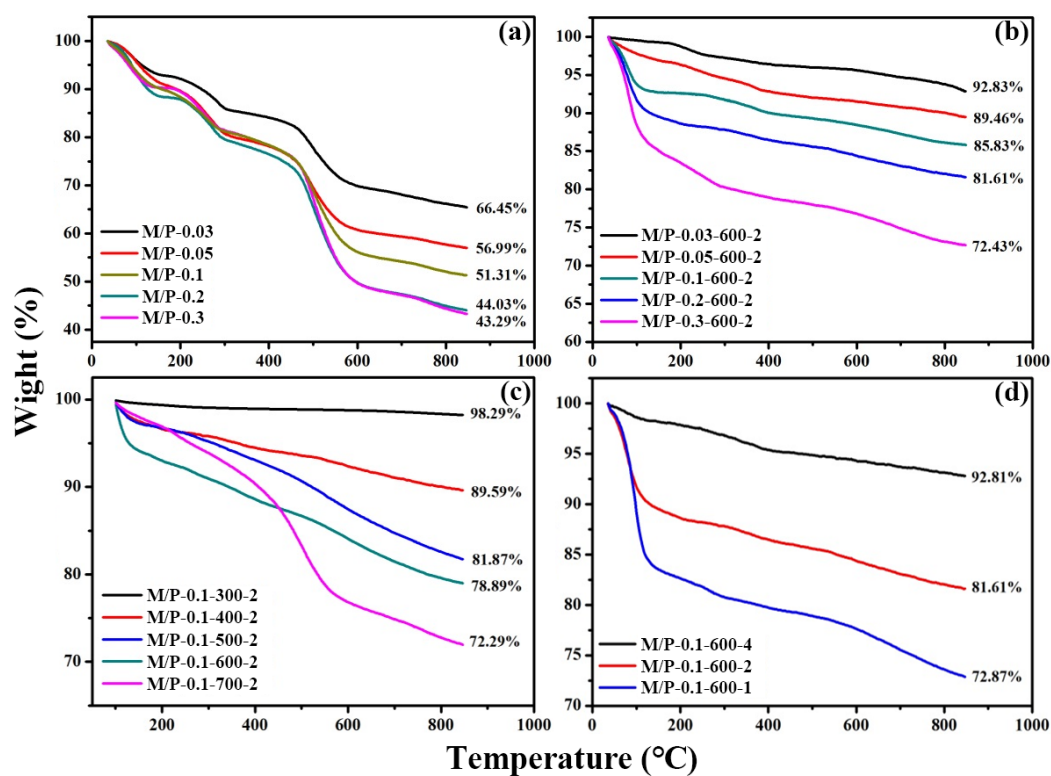

**Figure S3.** The TG curves of (a) M/P-x (x = 0, 0.03, 0.05, 0.1, 0.2, and 0.3), (b) M/P-x-600-2 (x = 0, 0.03, 0.05, 0.1, 0.2, and 0.3), (c) M/P-0.1-T (T = 0, 300, 400, 500, 600, and 700), and (d) M/P-0.1-600-y (y = 1, 2, and 4).

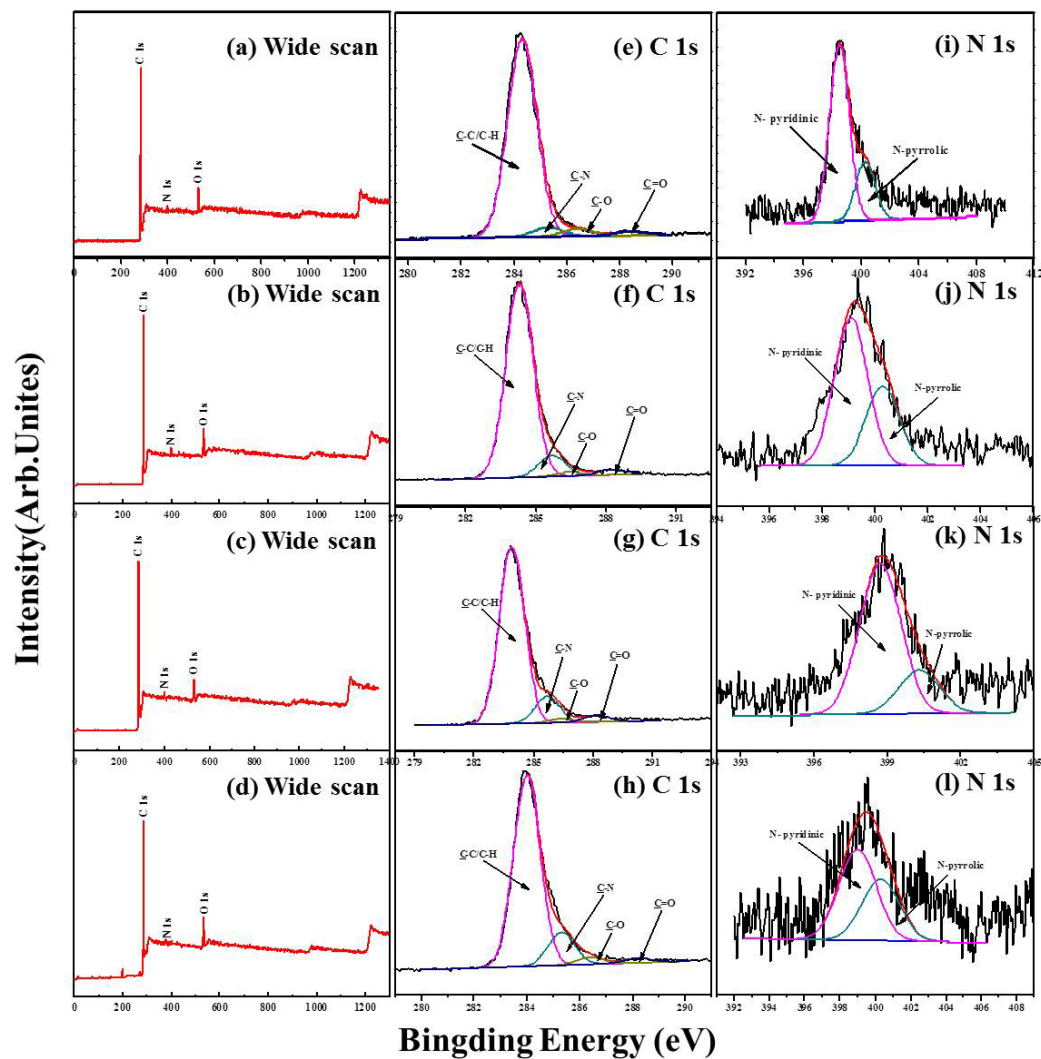

**Figure S4.** The XPS spectra of M/P-0.1-T-2 (T = 300, 400, 500, and 600). (a) Wide scan, (e) C 1s, and (i) N 1s regions of M/P-0.1-300-2. (b) Wide scan, (f) C 1s, and (j) N 1s regions of M/P-0.1-400-2. (c) Wide scan, (g) C 1s, and (k) N 1s regions of M/P-0.1-500-2. (d) Wide scan, (h) C 1s, and (l) N 1s regions of M/P-0.1-600-2.

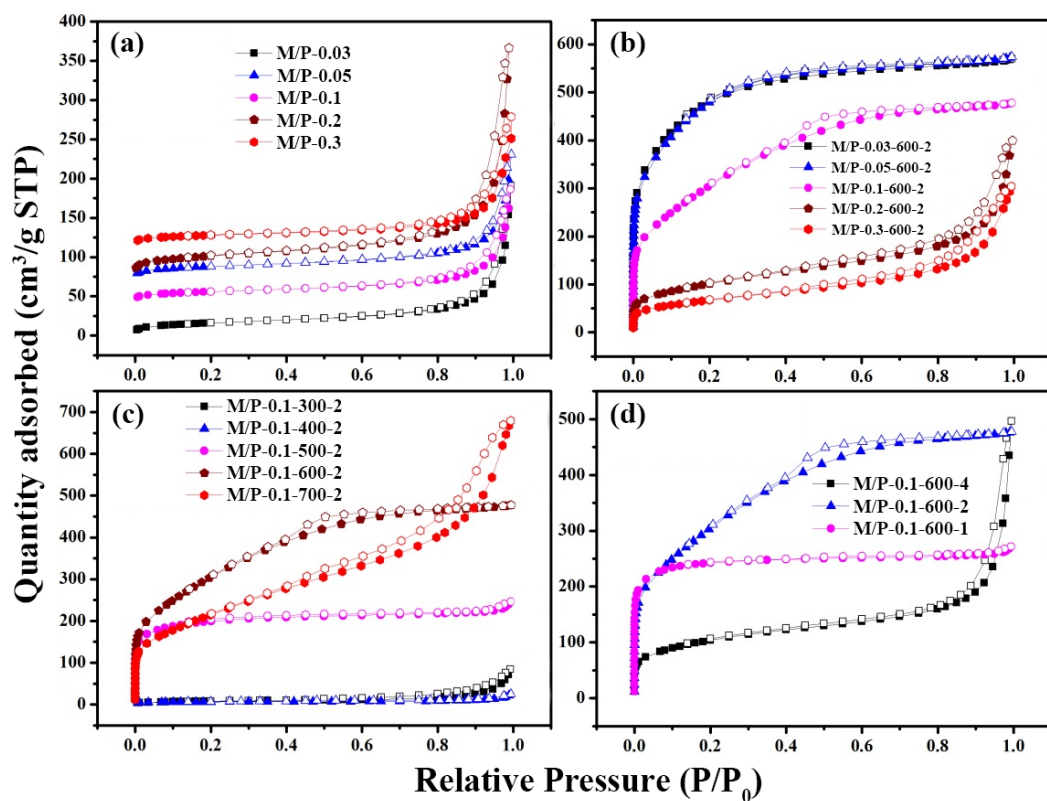

**Figure S5.** N<sub>2</sub> adsorption-desorption isotherms of (a) M/P-x ( $x = 0, 0.03, 0.05, 0.1, 0.2$ , and  $0.3$ ), (b) M/P-x-600-2 ( $x = 0, 0.03, 0.05, 0.1, 0.2$ , and  $0.3$ ), (c) M/P-0.1-T ( $T = 0, 300, 400, 500, 600$ , and  $700$ ), and (d) M/P-0.1-600-y ( $y = 1, 2$ , and  $4$ ).

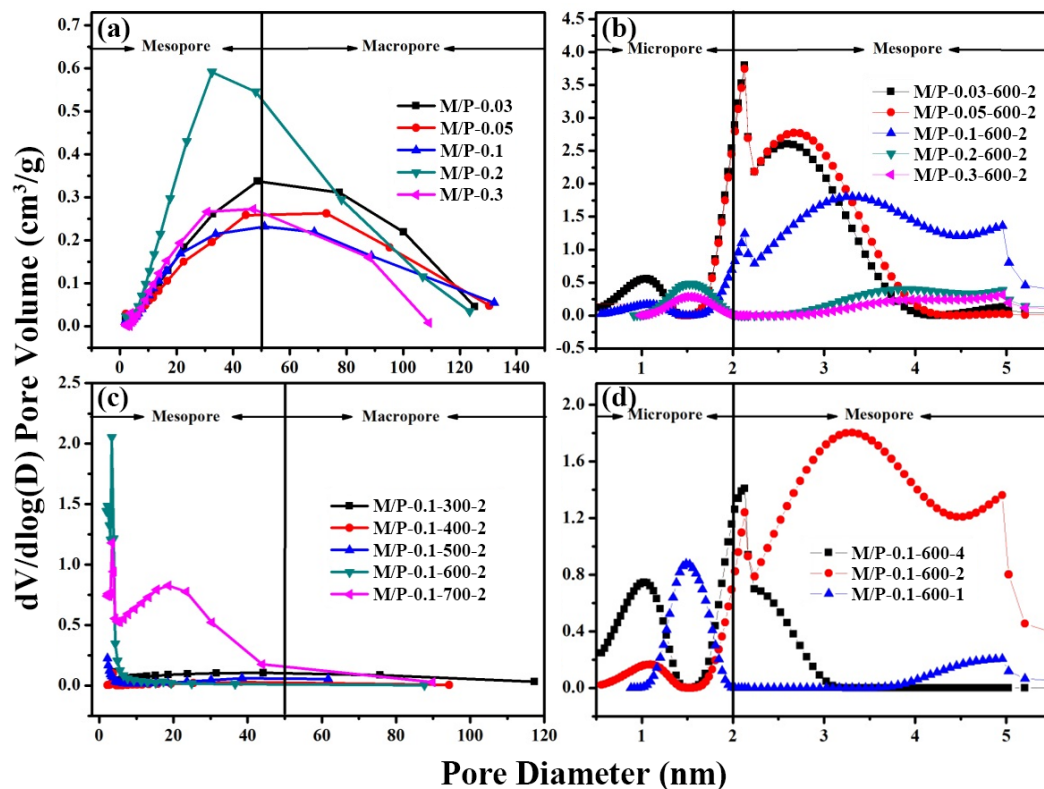

**Figure S6.** The pore size distribution profiles of (a) M/P-x ( $x = 0, 0.03, 0.05, 0.1, 0.2$ , and  $0.3$ ), (b) M/P-x-600-2 ( $x = 0, 0.03, 0.05, 0.1, 0.2$ , and  $0.3$ ), (c) M/P-0.1-T ( $T = 0, 300, 400, 500, 600$ , and  $700$ ), and (d) M/P-0.1-600-y ( $y = 1, 2$ , and  $4$ ).



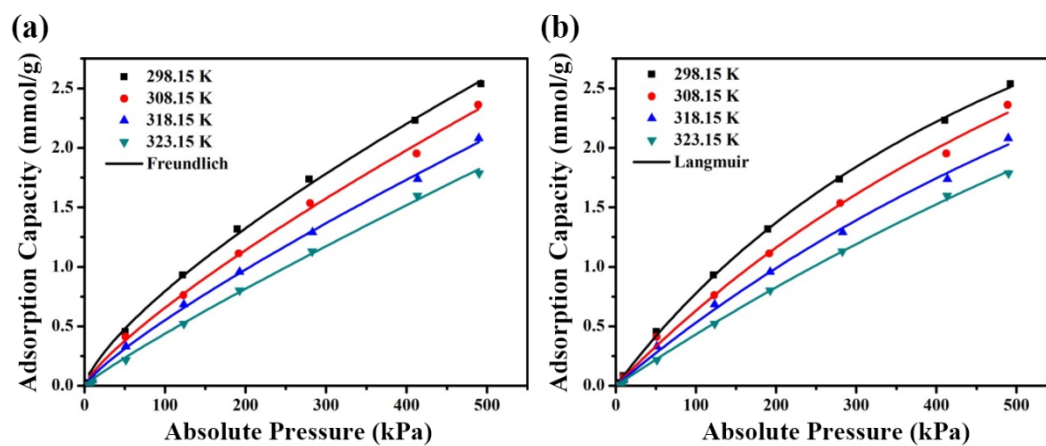

**Figure S7.** (a) Freundlich and (b) Langmuir fitted adsorption isotherms of M/P-0.1-600-2 at different temperatures.

**Table S1.** N content of M/P-0.1-T-2 (T = 0, 300, 400, 500, 600, and 700).

| <b>Sample</b>         | <b>N (wt%)</b> | <b>C (wt%)</b> | <b>O (wt%)</b> |
|-----------------------|----------------|----------------|----------------|
| <b>M/P-0.1</b>        | 4.14           | 89.30          | 6.56           |
| <b>M/P-0.1-300-2</b>  | 3.10           | 89.07          | 7.83           |
| <b>M/P-0.1-400-2</b>  | 3.69           | 86.40          | 9.91           |
| <b>M/P-0.1-500-2</b>  | 3.17           | 89.31          | 7.52           |
| <b>M/P-0.1-600-2</b>  | 3.11           | 88.31          | 8.58           |
| <b>M/P-0.1-700-2</b>  | 2.76           | 86.34          | 10.90          |
| <b>M/P-0.05-600-2</b> | 3.10           | 86.70          | 10.20          |
| <b>M/P-0.03-600-2</b> | 2.91           | 88.20          | 8.89           |

**Table S2.** BET data and CO<sub>2</sub> adsorption capacity of all samples.

| Sample         | $S_{\text{BET}}^a$<br>(m <sup>2</sup> /g) | Pore<br>volume <sup>b</sup><br>(cm <sup>3</sup> /g) | Pore size <sup>c</sup><br>(nm) | CO <sub>2</sub> adsorption<br>capacity <sup>d</sup><br>(mmol/g) |
|----------------|-------------------------------------------|-----------------------------------------------------|--------------------------------|-----------------------------------------------------------------|
| MWCNTs         | 104                                       | 0.48                                                | 19.4                           | 0.18                                                            |
| PANI           | 42                                        | 0.18                                                | 27.3                           | 0.54                                                            |
| M/P-0.03       | 47                                        | 0.26                                                | 23.9                           | 0.69                                                            |
| M/P-0.05       | 45                                        | 0.21                                                | 20.1                           | 0.72                                                            |
| M/P-0.1        | 58                                        | 0.22                                                | 23.0                           | 0.83                                                            |
| M/P-0.2        | 66                                        | 0.23                                                | 21.5                           | 0.75                                                            |
| M/P-0.3        | 87                                        | 0.44                                                | 24.0                           | 0.65                                                            |
| M/P-0.1-300-2  | 213                                       | 0.026                                               | 22.9                           | 1.10                                                            |
| M/P-0.1-400-2  | 289                                       | 0.13                                                | 10.5                           | 1.19                                                            |
| M/P-0.1-500-2  | 611                                       | 0.18                                                | 4.83                           | 1.76                                                            |
| M/P-0.1-600-2  | 1017                                      | 0.37                                                | 2.71                           | 2.63                                                            |
| M/P-0.1-700-2  | 780                                       | 0.94                                                | 6.42                           | 1.83                                                            |
| M/P-0.1-600-4  | 355                                       | 0.62                                                | 14.4                           | 1.62                                                            |
| M/P-0.1-600-1  | 740                                       | 0.062                                               | 5.13                           | 1.85                                                            |
| M/P-0.03-600-2 | 1570                                      | 0.24                                                | 2.95                           | 1.25                                                            |
| M/P-0.05-600-2 | 1601                                      | 0.27                                                | 2.87                           | 1.63                                                            |
| M/P-0.2-600-2  | 359                                       | 0.53                                                | 6.78                           | 1.75                                                            |
| M/P-0.3-600-2  | 238                                       | 0.44                                                | 9.44                           | 1.46                                                            |
| M/P-0-600-2    | -                                         | -                                                   | -                              | 1.16                                                            |

<sup>a</sup> BET surface area. <sup>b</sup>BJH adsorption cumulative volume of pores between 17.000 and 3,000.000 Å width. <sup>c</sup>BJH adsorption average pore width (4V/A). <sup>d</sup> CO<sub>2</sub> adsorption capacity at 298 K, 5 bar.

**Table S3.** CO<sub>2</sub> adsorption ability of M/P-0.1-600-2 and reported adsorbents in CO<sub>2</sub> capture.

| Adsorbents                                                          | Temperature<br>(K) | Pressure | CO <sub>2</sub> adsorption<br>capacity(mmol g <sup>-1</sup> ) | Ref.         |
|---------------------------------------------------------------------|--------------------|----------|---------------------------------------------------------------|--------------|
| M/P-0.1-600-2                                                       | 298                | 5 bar    | 2.63                                                          | This<br>work |
| Heptazine-based Polymeric<br>porous Framework                       | 273                | 1 bar    | 2.35                                                          | [1]          |
| Chestnut biomass carbon                                             | 298                | 1 bar    | 2.14                                                          | [2]          |
| Phloroglucinol based<br>Microporous polymeric<br>Organic frameworks | 298                | 1 bar    | 2.02                                                          | [3]          |
| Microporous organic<br>Polymers (CTHP)                              | 298                | 1bar     | 1.90                                                          | [4]          |
| Amine-grafted SBA-15                                                | 298                | 1 bar    | 1.88                                                          | [5]          |
| Melamine–formaldehyde<br>Resins N-doped carbon                      | 298                | 1 bar    | 1.86                                                          | [6]          |
| Amine-functionalized MIL-53<br>(Al) MOFs                            | 298                | 1 bar    | 1.82                                                          | [7]          |
| Mesoporous Carbon                                                   | 298                | 1 bar    | 1.50                                                          | [8]          |
| Amine-grafted Zeolite ITQ-6                                         | 293                | 1 bar    | 1.21                                                          | [9]          |

**Table S4.** Model fitting parameters of CO<sub>2</sub> adsorption isotherms on M/P-0.1-600-2 at different temperatures.

| Models                       | Fitted Parameters                                   | Temperature (K) |            |            |            |
|------------------------------|-----------------------------------------------------|-----------------|------------|------------|------------|
|                              |                                                     | 298.15 K        | 308.15 K   | 318.15 K   | 323.15 K   |
| <b>Freundlich</b>            | $K_F$ (mmol • g <sup>-1</sup> • kPa <sup>-n</sup> ) | 0.02705         | 0.01679    | 0.01236    | 0.00701    |
|                              | n                                                   | 1.36174         | 1.25596    | 1.21213    | 1.11421    |
|                              | $\chi^2(\times 10^{-4})$                            | 24.7            | 24.7       | 12         | 8.4438     |
|                              | $R^2$                                               | 0.9973          | 0.99674    | 0.99797    | 0.99823    |
| <b>Langmuir</b>              | $Q_{max}$ (mmol • g <sup>-1</sup> )                 | 2.5312          | 2.3143     | 1.9324     | 1.8023     |
|                              | $K_L$ (kPa <sup>-1</sup> )                          | 0.00154         | 9.82782E-4 | 7.78396E-4 | 4.6644E-4  |
|                              | $\chi^2(\times 10^{-4})$                            | 5.738           | 30.8       | 19.2       | 3.411      |
|                              | $R^2$                                               | 0.99937         | 0.99593    | 0.99675    | 0.99929    |
| <b>Redlich<br/>-Peterson</b> | $a_R$ (kPa <sup>-b<sub>R</sub></sup> )              | 0.01023         | 0.14176    | 0.30359    | 2.69341E-9 |
|                              | $K_R$ (mmol • g <sup>-1</sup> • kPa <sup>-n</sup> ) | 0.01041         | 0.01209    | 0.01203    | 0.00417    |
|                              | $b_R$                                               | 0.74385         | 0.38689    | 0.2949     | 2.87064    |
|                              | $\chi^2(\times 10^{-4})$                            | 3.9993          | 26.9       | 13.6       | 1.9832     |
|                              | $R^2$                                               | 0.99956         | 0.99645    | 0.9977     | 0.99959    |

$K_L$  and  $K_F$  represent Langmuir balanced adsorption constant and Freundlich adsorption constant.  $K_R$ ,  $a_R$ ,  $b_R$  are empirical constants of Redlich-Peterson isotherm equation.

**Table S5.** Kinetic parameters of CO<sub>2</sub> adsorption on M/P-0.1-600-2.

| Samples       | Models               | Fitted Parameters             |                               |                                  |        |                          |       |
|---------------|----------------------|-------------------------------|-------------------------------|----------------------------------|--------|--------------------------|-------|
|               |                      | $k_F$<br>(min <sup>-n</sup> ) | $k_L$<br>(min <sup>-1</sup> ) | $Q_e$<br>(mmol·g <sup>-1</sup> ) | $n$    | $\chi^2(\times 10^{-4})$ | $R^2$ |
| M/P-0.1-600-2 | Fickian<br>diffusion | 1.568                         | -                             | 2.621                            | 0.0123 | 3.50                     | 0.999 |
|               | LDF                  | -                             | 5.374                         | 2.564                            | -      | 21.30                    | 0.996 |

## References

- [1] Dang, QQ.; Zhan, YF.; Wang, XM.; Zhang, XM. *ACS Appl. Mater. Interfaces* **2015**, 7, 28452 – 28458.
- [2] Nelson, KM.; Mahurin, SM.; Mayes, RT.; Williamson, B.; Teague, CM.; Binder, AJ.; Baggetto, L.; Veith GM.; Dai, S. *Micropor. Mesopor. Mat.* **2016**, 222, 94 – 103.
- [3] Katsoulidis, AP.; Kanatzidis, MG. *Chem. Mater.* **2011**, 23, 1818 – 1824.
- [4] Gao, H.; Ding, L.; Bai, H.; Li, L. *ChemSusChem* **2017**, 10, 618–623.
- [5] Lashaki, MJ.; Sayari, A. *Chem. Eng. J.* **2018**, 334, 1260 – 1269.
- [6] Pevida, C; Drage, TC; Snape, CE. *Carbon* **2008**, 46, 1464 – 1474.
- [7] Kim, J.; Kim, WY.; Ahn, W-S. *Fuel* **2012**, 102, 574 – 579.
- [8] Peng, X.; Zhang, Q.; Cheng, X.; Cao, D. *Acta phys-Chim. Sin.* **2011**, 27, 2065–2071.
- [9] Zukal, A.; Dominguez, I.; Mayerova, J.; Cejka, J. *Langmuir* **2009**, 25, 10314 – 10321.
